# Supplementary material for: Is degradation of dyes even possible without using photocatalysts? – a detailed comparative study
Source: Royal Society of Chemistry journal article supplement (doi:10.1039/d2ra05779d), 2022-01-01
Supplement: d2ra05779d1.pdf [file d2ra05779d1.pdf]

Supporting file for

## **Is Degradation of Dyes Even Possible Without Using 'Photocatalyst'? – A Detailed Comparative Study**

Subhadeep Sen<sup>a</sup>, Chanchal Das<sup>a</sup>, Narendranath Ghosh<sup>b</sup>, Nabojyoti Baildya<sup>c</sup>, Sumantra  
Bhattacharya<sup>d</sup>, Moonis Ali Khan<sup>e</sup>, Mika Sillanpää<sup>f,g</sup>, Goutam Biswas<sup>a\*</sup>

<sup>a</sup>*Department of Chemistry, Cooch Behar Panchanan Barma University, Cooch Behar, West Bengal, 736101, India.*

<sup>b</sup>*Department of Chemistry, University of Gour Banga, Mokdumpur, Malda-732103, India.*

<sup>c</sup>*Department of Chemistry, University of Kalyani, Kalyani 741235, India*

<sup>d</sup>*Department of Chemistry, National Institute of Technology Sikkim, Barfung Block, Ravangla, South Sikkim, Sikkim, PIN-737139, India.*

<sup>e</sup>*Chemistry Department, College of Science, King Saud University, Riyadh 11451, Saudi Arabia.*

<sup>f</sup>*Department of Biological and Chemical Engineering, Aarhus University, Aarhus C, Denmark*

<sup>g</sup>*Department of Chemical Engineering, School of Mining, Metallurgy and Chemical Engineering, University of Johannesburg, P. O. Box 17011, Doornfontein 2028, South Africa.*

\*Corresponding Author: *Department of Chemistry, Cooch Behar Panchanan Barma University, Cooch Behar, West Bengal, India 736101; Email address: [goutam@cbpbu.ac.in](mailto:goutam@cbpbu.ac.in) (G. Biswas).*

### **Table of contents:**

|                               |     |
|-------------------------------|-----|
| 1. Supplementary Figures..... | 2   |
| 2. Supplementary Tables.....  | 3-4 |

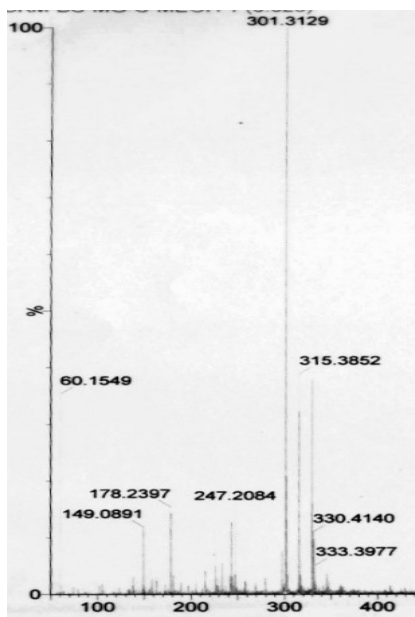

(a)

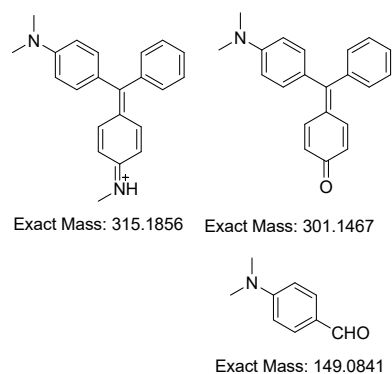

(b)

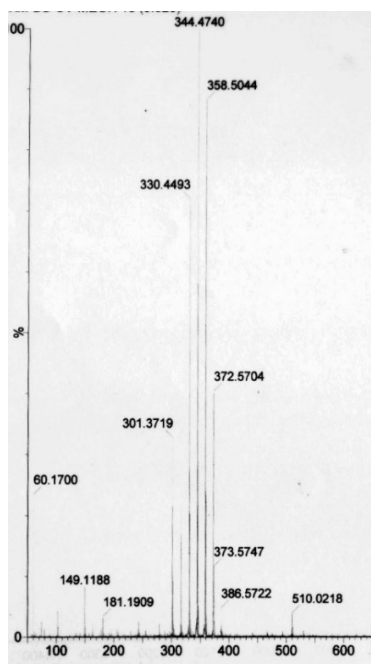

(c)

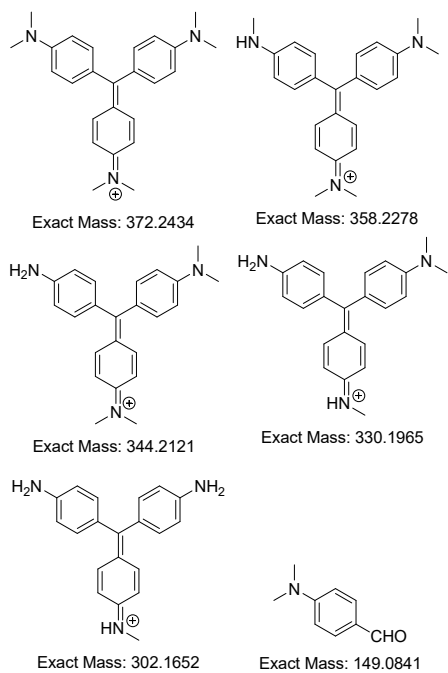

(d)

**Fig. S1.** Mass spectra after degradation of (a) MG and (c) CV dyes; (b) and (d) are the structures obtained after degradation of MG and CV, respectively [1–3].

**Table S1**

Absorption wavelengths of MG and CV in different functionals in water.

| Dye Name        | Functional | Basis Set   | $\lambda_{\max}$ (nm) | Experiment ( $\lambda_{\max}$ , nm) |
|-----------------|------------|-------------|-----------------------|-------------------------------------|
| Malachite Green | B3LYP      | 6-31G+(d,p) | 520                   | 617                                 |
|                 | PBEPBE     |             | 570                   |                                     |
| Crystal Violet  | B3LYP      | 6-31G+(d,p) | 509                   | 590                                 |
|                 | PBEPBE     |             | 573                   |                                     |

**Table S2**

Various properties related to absorption of MG and CV at B3LYP/6-31G+(d,p) level of theory in water.

| Dye | $\lambda_{\max}$ (nm) | Excitation Energy (eV) | Oscillator strength | Orbital involved and % contribution |
|-----|-----------------------|------------------------|---------------------|-------------------------------------|
| MG  | 570                   | 2.1767                 | 0.8617              | H→L (100%)                          |
|     | 462                   | 2.6821                 | 0.2799              | H-1→L (94%)                         |
|     | 408                   | 3.0405                 | 0.0011              | H-2→L (98%)                         |
| CV  | 573.1                 | 2.1632                 | 0.6768              | H-1 →L (46%), H →L (54%)            |
|     | 573.0                 | 2.1636                 | 0.6774              | H-1 →L (54%), H →L (46%)            |
|     | 377                   | 2.9353                 | 0.0005              | H-4->LUMO (94%)                     |

**Table S3**

Tabulated data for electrochemical[4], computational value of the CV and MG dyes.

| Dye | Cyclic Voltammetry Data |                       |                       | Computed Data |           |               |
|-----|-------------------------|-----------------------|-----------------------|---------------|-----------|---------------|
|     | E <sub>ox</sub> (eV)    | E <sub>red</sub> (eV) | ΔE <sub>CV</sub> (eV) | HOMO (eV)     | LUMO (eV) | Band Gap (eV) |
| CV  | -5.7                    | -3.79                 | 1.91                  | -5.72         | -3.04     | 2.68          |
| MG  | -5.66                   | -4.04                 | 1.62                  | -5.82         | -3.29     | 2.53          |

**Reference:**

- [1] S. Shanmugam, P. Ulaganathan, K. Swaminathan, S. Sadhasivam, Y.-R. Wu, Enhanced biodegradation and detoxification of malachite green by *Trichoderma asperellum* laccase: Degradation pathway and product analysis, *International Biodeterioration & Biodegradation*. 125 (2017) 258–268. <https://doi.org/10.1016/j.ibiod.2017.08.001>.
- [2] Q. Xu, H. You, Y. Jia, Y. Yu, H. Li, Aquaculture drug degradation in persulfate by PANI-based microparticles controlled via ultrasonic field: Forced motion of “burning hot micromotors,” *Chemosphere*. 275 (2021) 130098. <https://doi.org/10.1016/j.chemosphere.2021.130098>.
- [3] Y.-R. Huang, Y. Kong, H.-Z. Li, X.-M. Wei, Removal of crystal violet by ultraviolet/persulfate: Effects, kinetics and degradation pathways, *Environmental Technology & Innovation*. 18 (2020) 100780. <https://doi.org/10.1016/j.eti.2020.100780>.
- [4] C.H. Ng, C.A. Ohlin, B. Winther-Jensen, Characterisation of a series of triarylmethane dyes as light harvesters for photo-electrochemical systems, *Dyes and Pigments*. 115 (2015) 96–101. <https://doi.org/10.1016/j.dyepig.2014.12.016>.
